# Supplementary material
Source: PubMed Central journal article supplement (PMC3009849)
Supplement: supp_M110.156273_jbc.M110.156273-1.pdf [file supp_M110.156273_jbc.M110.156273-1.pdf]

Supplemental Table S1. **Plasmids used in this study**

| Plasmid       | Genotype                                                                                 | Source     |
|---------------|------------------------------------------------------------------------------------------|------------|
| pUC-119       | <i>bla</i> $\Delta$ <i>lacZ</i>                                                          | Takara     |
| pQE-30        | <i>bla</i>                                                                               | Qiagen     |
| pUC-SLT       | <i>bla</i> $\Delta$ <i>lacZ</i> $\Delta$ <i>cwlP</i> (SLT domain of CwlP)                | This study |
| pQE-SLT       | <i>bla</i> (His) <sub>6</sub> - $\Delta$ <i>cwlP</i> (SLT domain of CwlP)                | This study |
| pQE-M23       | <i>bla</i> (His) <sub>6</sub> - $\Delta$ <i>cwlP</i> (peptidase M23 domain of CwlP)      | This study |
| pQE-SLTM23    | <i>bla</i> (His) <sub>6</sub> - $\Delta$ <i>cwlP</i> (SLT-peptidase M23 domains of CwlP) | This study |
| pQE-YomI-FL   | <i>bla</i> (His) <sub>6</sub> - <i>cwlP</i> (entire region of CwlP)                      | This study |
| pQESLT-E1447Q | <i>bla</i> (His) <sub>6</sub> -mutated $\Delta$ <i>cwlP</i> (mutated CwlP-SLT, E1447Q)   | This study |
| pQESLT-E1447A | <i>bla</i> (His) <sub>6</sub> -mutated $\Delta$ <i>cwlP</i> (mutated CwlP-SLT, E1447A)   | This study |
| pQESLT-S1448A | <i>bla</i> (His) <sub>6</sub> -mutated $\Delta$ <i>cwlP</i> (mutated CwlP-SLT, S1448A)   | This study |
| pQESLT-S1456A | <i>bla</i> (His) <sub>6</sub> -mutated $\Delta$ <i>cwlP</i> (mutated CwlP-SLT, S1456A)   | This study |
| pQESLT-Q1465A | <i>bla</i> (His) <sub>6</sub> -mutated $\Delta$ <i>cwlP</i> (mutated CwlP-SLT, Q1465A)   | This study |
| pQESLT-D1481N | <i>bla</i> (His) <sub>6</sub> -mutated $\Delta$ <i>cwlP</i> (mutated CwlP-SLT, D1481N)   | This study |
| pQESLT-Q1484L | <i>bla</i> (His) <sub>6</sub> -mutated $\Delta$ <i>cwlP</i> (mutated CwlP-SLT, Q1484L)   | This study |
| pQESLT-N1485A | <i>bla</i> (His) <sub>6</sub> -mutated $\Delta$ <i>cwlP</i> (mutated CwlP-SLT, N1485A)   | This study |
| pQESLT-N1512A | <i>bla</i> (His) <sub>6</sub> -mutated $\Delta$ <i>cwlP</i> (mutated CwlP-SLT, N1512A)   | This study |
| pQESLT-E1529Q | <i>bla</i> (His) <sub>6</sub> -mutated $\Delta$ <i>cwlP</i> (mutated CwlP-SLT, E1529Q)   | This study |
| pQEM23-H1580Q | <i>bla</i> (His) <sub>6</sub> -mutated $\Delta$ <i>cwlP</i> (mutated CwlP-M23, H1580Q)   | This study |
| pQEM23-D1584N | <i>bla</i> (His) <sub>6</sub> -mutated $\Delta$ <i>cwlP</i> (mutated CwlP-M23, D1584N)   | This study |
| pQEM23-N1612A | <i>bla</i> (His) <sub>6</sub> -mutated $\Delta$ <i>cwlP</i> (mutated CwlP-M23, N1612A)   | This study |
| pQEM23-H1628Q | <i>bla</i> (His) <sub>6</sub> -mutated $\Delta$ <i>cwlP</i> (mutated CwlP-M23, H1628Q)   | This study |
| pQEM23-Q1645A | <i>bla</i> (His) <sub>6</sub> -mutated $\Delta$ <i>cwlP</i> (mutated CwlP-M23, Q1645A)   | This study |
| pQEM23-S1656A | <i>bla</i> (His) <sub>6</sub> -mutated $\Delta$ <i>cwlP</i> (mutated CwlP-M23, S1656A)   | This study |
| pQEM23-H1660Q | <i>bla</i> (His) <sub>6</sub> -mutated $\Delta$ <i>cwlP</i> (mutated CwlP-M23, H1660Q)   | This study |
| pQEM23-H1662Q | <i>bla</i> (His) <sub>6</sub> -mutated $\Delta$ <i>cwlP</i> (mutated CwlP-M23, H1662Q)   | This study |
| pQEM23-N1668A | <i>bla</i> (His) <sub>6</sub> -mutated $\Delta$ <i>cwlP</i> (mutated CwlP-M23, N1668A)   | This study |
| pQEM23-D1673A | <i>bla</i> (His) <sub>6</sub> -mutated $\Delta$ <i>cwlP</i> (mutated CwlP-M23, D1673A)   | This study |

Supplemental Table S2. **Primers used in this study**

| Primer name | Sequence (5'->3')                                     | Construct name        |
|-------------|-------------------------------------------------------|-----------------------|
| BF-SLT      | <i>gccgggatcc</i> GGCAAGTATTCAAGCTACA                 | pQE-SLT<br>pQE-SLTM23 |
| KR-SLT      | <i>gcgcggtacc</i> GGCCATGATCTTCTTGAC                  | pQE-SLT               |
| BF-M23      | <i>gccgggatcc</i> AAGAAGATCATGGCCAAC                  | pQE-M23               |
| HR-M23      | <i>gcgcaagctt</i> TTTAGCCTGAGCTATCCC                  | pQE-M23               |
| KR-M23      | <i>gcgcggtacc</i> TTTAGCCTGAGCTATCCC                  | pQE-SLTM23            |
| BF-YomI-FL  | <i>gccgggatcc</i> TTGAGTCAAAACCTCAAAATT               | pQE-YomI-FL           |
| KR-YomI-FL  | <i>cgcggtacc</i> CATGCTACCATTTAGTTTTAC                | pQE-YomI-FL           |
| E1447Q-1    | GCAGCTGTAATTCAGCAAc <u>AA</u> TCAGGGTTTAATGC          | pQESLT-E1447Q         |
| E1447Q-2    | GCATTAAACCCTGATTgTTGCTGAATTACAGCTGC                   | pQESLT-E1447Q         |
| E1447A-1    | GCAGCTGTAATTCAGCAAG <u>cA</u> TCAGGGTTTAATGC          | pQESLT-E1447A         |
| E1447A-2    | GCATTAAACCCTGATgCTTGCTGAATTACAGCTGC                   | pQESLT-E1447A         |
| S1448A-1    | GCTGTAATTCAGCAAGAAg <u>CA</u> GGGTTTAATGCTAAAG        | pQESLT-S1448A         |
| S1448A-2    | CTTTAGCATTAAACCCTGcTTCTTGCTGAATTACAGC                 | pQESLT-S1448A         |
| S1456A-1    | GCTAAAGCACGA <u>gC</u> TGGTGTAGGTGCC                  | pQESLT-S1456A         |
| S1456A-2    | GGCACCTACACCAGcTCGTGCTTTAGC                           | pQESLT-S1456A         |
| Q1465A-1    | CCATGGGATTAATG <u>gcA</u> CTGATGCCAGCAAC              | pQESLT-Q1465A         |
| Q1465A-2    | GTTGCTGGCATCAGTgcCATTAAATCCCATGG                      | pQESLT-Q1465A         |
| D1481N-1    | GGAGTAAATAACGCTTAC <u>aA</u> TCTTATCAAAATGTTATGGGTG   | pQESLT-D1481N         |
| D1481N-2    | CACCCATAACATTTTGATAAGGA <u>AT</u> tGTAAGCGTTATTTACTCC | pQESLT-D1481N         |
| Q1484L-1    | CGCTTACGATCCTTATC <u>tA</u> AAATGTTATGGGTGGAAC        | pQESLT-Q1484L         |
| Q1484L-2    | GTTCCACCCATAACATTTaGATAAGGATCGTAAGCG                  | pQESLT-Q1484L         |
| N1485A-1    | CGCTTACGATCCTTATCA <u>gcT</u> GTTATGGGTGGAAC          | pQESLT-N1485A         |
| N1485A-2    | GTTCCACCCATAACAgcTTGATAAGGATCGTAAGCG                  | pQESLT-N1485A         |
| N1512A-1    | CATTGGCTGCATAT <u>gcT</u> GCTGGGCCTGGTAAC             | pQESLT-N1512A         |
| N1512A-2    | GTTACCAGGCCCAGCAgcATATGCAGCCAATG                      | pQESLT-N1512A         |
| E1529Q-1    | GGTATCCCTCCTTTTAAAc <u>AA</u> ACACAGAATTACGTC         | pQESLT-E1529Q         |
| E1529Q-2    | GACGTAATTCTGTGTTTgTTTAAAAGGAGGGATAACC                 | pQESLT-E1529Q         |
| H1580Q-1    | CTCCGCTCCTCCCCA <u>CA</u> aAAAGGAACTGATTTTGC          | pQEM23-H1580Q         |
| H1580Q-2    | GCAAAATCAGTTCCTTTtGTGTTGGGAGGAGCGGAG                  | pQEM23-H1580Q         |

|          |                                                |               |
|----------|------------------------------------------------|---------------|
| D1584N-1 | CCCCACACAAAGGAACT <u>a</u> ATTTTGGCTGCAAAAGCAG | pQEM23-D1584N |
| D1584N-2 | CTGCTTTTGCAGCAAAATtAGTTCCTTTGTGTGGG            | pQEM23-D1584N |
| N1612A-1 | GCTACAGTAAAAGTGCAGGTgcCTGGGTTGTTATTAAACAGG     | pQEM23-N1612A |
| N1612A-2 | CCTGTTTAATAACAACCCAGgcACCTGCAGTTTTACTGTAGC     | pQEM23-N1612A |
| H1628Q-1 | GTTGCCAAGTACATGCAgATGCTTAACACTCCTTC            | pQEM23-H1628Q |
| H1628Q-2 | GAAGGAGTGTTAAGCATcTGCATGTACTTGGCAAC            | pQEM23-H1628Q |
| Q1645A-1 | GTCAATCAGTTAAAGCCGGTgcAACTATTGGTAAAGTTGGTAG    | pQEM23-Q1645A |
| Q1645A-2 | CTACCAACTTTACCAATAGTgcACCGGCTTTAACTGATTGAC     | pQEM23-Q1645A |
| S1656A-1 | GGTAGTACAGGGAACgCGACTGGGAACACCTTC              | pQEM23-S1656A |
| S1656A-2 | GAAGGTGGTTCCCAGTCGcGTTCCCTGTACTACC             | pQEM23-S1656A |
| H1660Q-1 | GGGAACTCGACTGGGAACCAgCTTCATTTACAGATCG          | pQEM23-H1660Q |
| H1660Q-2 | CGATCTGTAAATGAAGcTGGTCCCAGTCGAGTCCC            | pQEM23-H1660Q |
| H1662Q-1 | CTGGGAACCACCTTCAgTTACAGATCGAACAAAATGG          | pQEM23-H1662Q |
| H1662Q-2 | CCATTTTGTTCGATCTGTAAcTGAAGGTGGTTCCCAG          | pQEM23-H1662Q |
| N1668A-1 | CCTTCATTTACAGATCGAACAAgcTGGAAAAACAATCGATCCTG   | pQEM23-N1668A |
| N1668A-2 | CAGGATCGATTGTTTTTCCAgcTTGTTCGATCTGTAAATGAAGG   | pQEM23-N1668A |
| D1673A-1 | CAAAATGGAAAAACAATCGcTCCTGAAAAGTACATGCAAGG      | pQEM23-D1673A |
| D1673A-2 | CCTTGCATGTACTTTTCAGGAgCGATTGTTTTTCCATTTG       | pQEM23-D1673A |

Lowercase letters and underlining indicate mutated bases and mutated codons in CwIP-SLT and CwIP-M23, respectively. Lowercase letters shown in italics and double-underlining indicate tag sequences and restriction sites, respectively. Plasmids were constructed using the primers shown.

Supplemental Table S3. **Hydrolytic activities of CwIP-SLT, CwIP-M23 and their point-mutated proteins using zymography**

(A) CwIP-SLT

| Protein name      | WT  | E1447Q | E1447A | S1448A | S1456A | Q1465A | D1481N | N1485A | N1512A | E1529Q |
|-------------------|-----|--------|--------|--------|--------|--------|--------|--------|--------|--------|
| Relative activity | 100 | 0.7    | 1.1    | 6.1    | 8.1    | 15.7   | 95.5   | 8.3    | 9.1    | 97.4   |

Aliquots of the wild-type CwIP-SLT [5 µg/ml (0.33 µM)] and the mutated CwIP-SLT were applied to gels and incubated at 37°C for 1 hour in renaturation solution (1% Triton X-100, pH 5.0). The hydrolytic activities were determined using the CS Analyzer 2.1 software (ATTO) and are shown along with the relative activity of the wild-type (WT) CwIP-SLT enzyme. Hydrolytic activity of less than 2% was within experimental error. Therefore, E1447Q and E1447A were determined to have no hydrolytic activity.

(B) CwIP-M23

| Protein name      | WT  | H1580Q | D1584N | N1612A | H1628Q | Q1645A | S1656A | H1660Q | H1662Q | N1668A | D1673A |
|-------------------|-----|--------|--------|--------|--------|--------|--------|--------|--------|--------|--------|
| Relative activity | 100 | 6.1    | 5.6    | 87.6   | 0.2    | 97.3   | 82.9   | 1.5    | 8.9    | 90.7   | 87.1   |

Aliquots of the wild-type CwIP-M23 [1 µg/ml (0.051 µM)] and the mutated CwIP-M23 were applied to gels and incubated at 40°C for 45 min in renaturation solution (1% Triton X-100, pH 7.5). The hydrolytic activities were determined using the CS Analyzer 2.1 software (ATTO) and are shown along with the relative activity of the wild-type (WT) CwIP-M23 enzyme. Hydrolytic activity of less than 2% was within experimental error. Therefore, H1628Q and H1660Q were determined to have no hydrolytic activity.
