# Supplementary material
Source: PubMed Central journal article supplement (PMC3009849)
Supplement: supp_M110.156273_jbc.M110.156273-2.pdf [file supp_M110.156273_jbc.M110.156273-2.pdf]

## SUPPLEMENTAL FIGURE LEGENDS

Supplemental Figure S1. **Cell wall hydrolytic activity of CwIP-SLT, CwIP-M23, CwIP-SLTM23 and full-length CwIP.** SDS gels (lanes M, C, 1, 2 and 3) and zymogram gels (lane 4) containing 14% polyacrylamide. Lane M: protein standard; lane C in panel D: whole cell extract from *Escherichia coli* M15 (no plasmid, control). Lanes 1 and 2: whole cell extracts from *E. coli* JM109 (pQE-SLT) (panel A); *E. coli* JM109 (pQE-M23) (panel B); *E. coli* JM109 (pQE-SLTM23) (panel C); and *E. coli* M15 (pQE-YomI-FL) (panel D), without (lane 1) or with (lane 2) over-expression of the proteins. Lanes 3 and 4: purified protein and zymography, respectively, for CwIP-SLT (panel A), CwIP-M23 (panel B), CwIP-SLTM23 (panel C) and full-length CwIP (panel D). To renature the proteins for the zymography experiments, gels were incubated at 37°C for 3 hours in the renaturation solution (1% Triton X-100, pH 5.0) (panel A), at 40°C for 3 hours in the renaturation solution (1% Triton X-100, pH 7.5) (panel B), or at 37°C for 3 hours (panel C) or overnight (panel D) in the renaturation solution (1% Triton X-100, pH 7.5).

Supplemental Figure S2. **ESI-MS analysis of the peak 2 material shown in Fig. 2A.** Panels A and B show the results for the peak 2 material (a reduced tetrasaccharide) obtained from MS analysis conducted in positive (Panel A) and negative modes (Panel B). The ion peaks for both modes correspond to the  $[M+Na]^+$  ( $m/z$  999.9) and  $[M-H]^-$  ( $m/z$  975.7) ions of a reduced tetrasaccharide, GlcNAc-MurNAc-GlcNAc-MurNAc ( $M_r$ , 977).

Supplemental Figure S3. **ESI-MS and -MS/MS analyses of the peak 3 material shown in Fig. 2A.** Panel A shows the result for the peak 3 material (a reduced hexasaccharide) obtained from MS analysis performed in the negative mode. The ion peak corresponds to the  $[M-H]^-$  ( $m/z$  1,454.9) ion of a reduced hexasaccharide ( $M_r$ , 1,456). Panel B shows the result for the peak 3 material obtained from MS/MS analysis performed in the negative mode. The material in peak 3 was identified as GlcNAc-MurNAc-GlcNAc-MurNAc-GlcNAc-MurNAc. Panel C shows the structure identified and the calculated molecular weight of each fragment in peak 3. Ion series *b* and *y* correspond to the fragment peaks of peak 3 material.

Supplemental Figure S4. **Determination of cleavage sites for CwIP-M23 and LytF by RP-HPLC.** *Bacillus subtilis* peptidoglycan was digested with CwIP-M23 followed by LytF

(D,L-endopeptidase). The free amino acid residues in the sample were labeled with FDNB and then hydrolyzed with HCl, followed by RP-HPLC separation. The sample contained mono-DNP-A<sub>2</sub>pm, bis-DNP-A<sub>2</sub>pm, and DNP.

Supplemental Figure S5. **Hydrolysis of *Escherichia coli* cells with CwIP-SLT and CwIP-M23 proteins.** *E. coli* JM109 cells (0.3 of OD<sub>600</sub>) were digested with 0.1 μM of CwIP-SLT at 37°C (pH 5) (closed squares), or with 0.1 μM of CwIP-M23 at 40°C (pH 7.5) (closed triangles). The open circles are *E. coli* JM109 samples without enzymatic digestion (control). The error bars indicate the standard deviations from three independent experiments.
