# Supplementary material
Source: PubMed Central journal article supplement (PMC3009849)

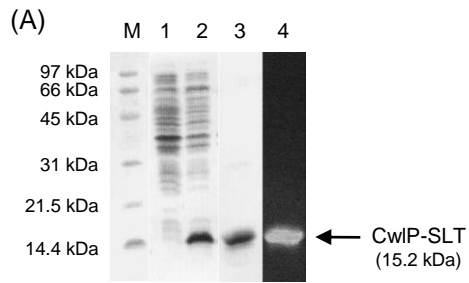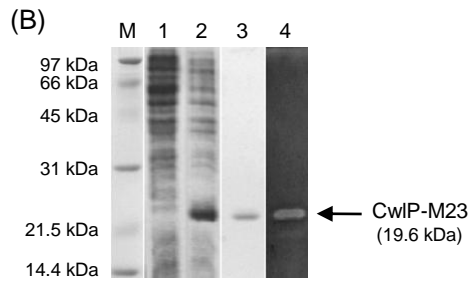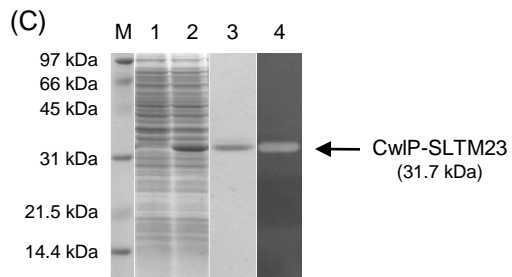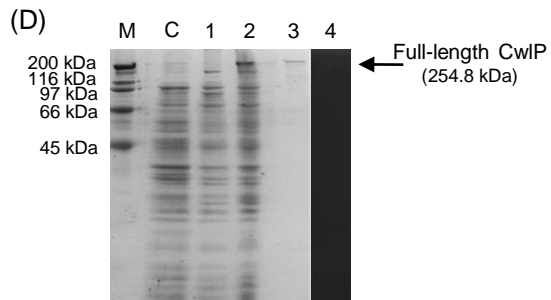

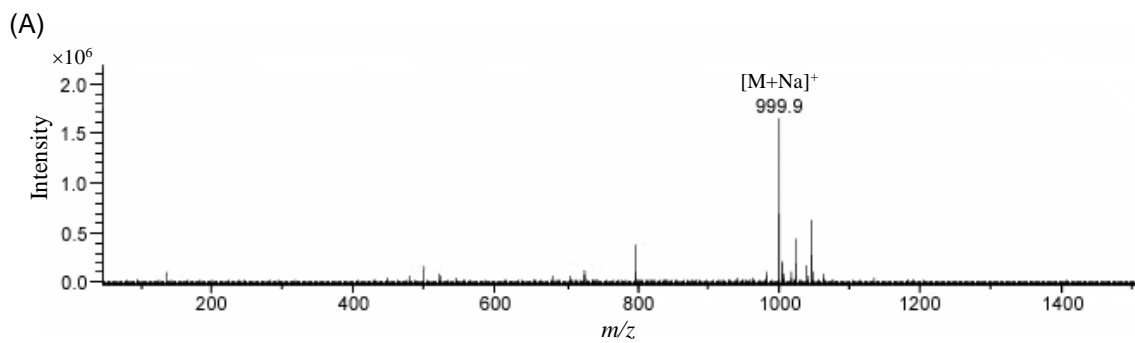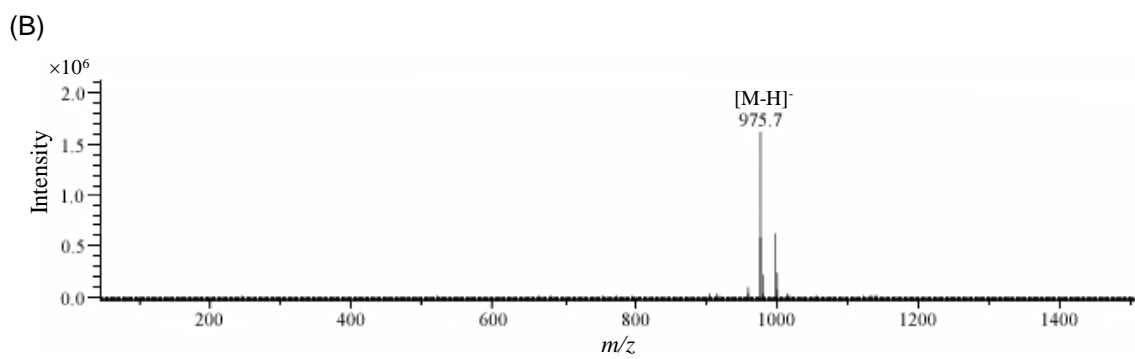

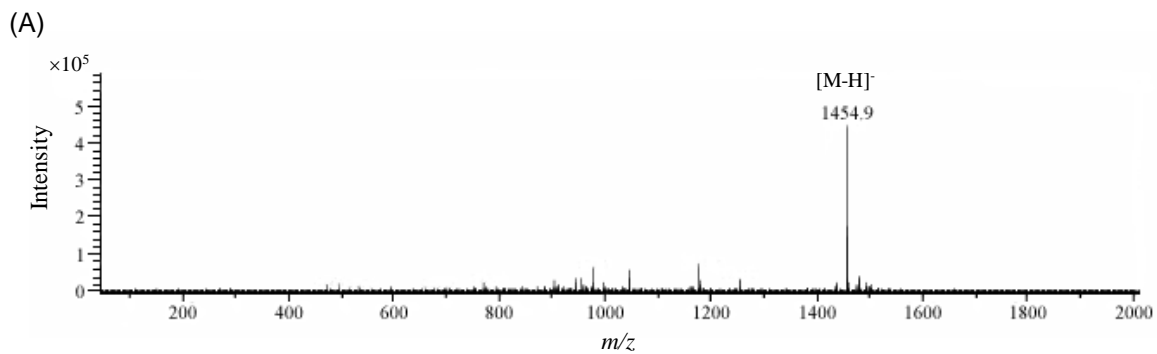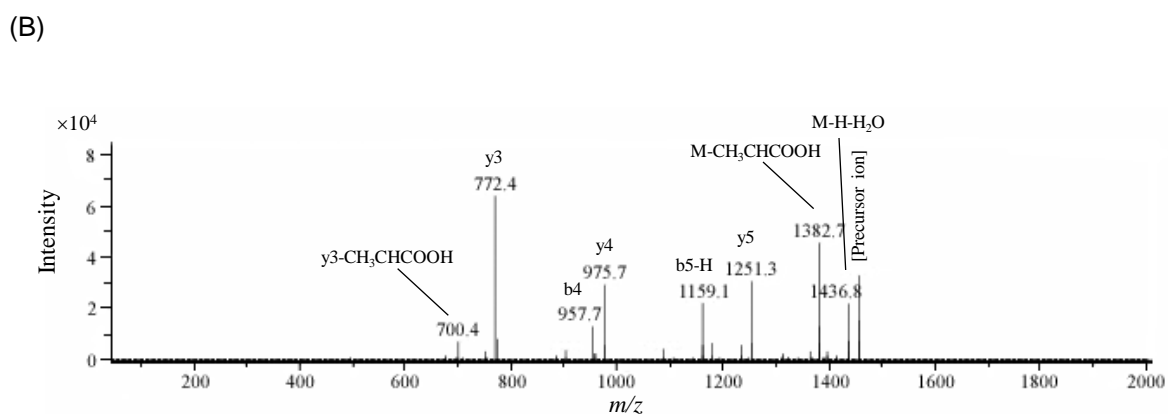

(C)

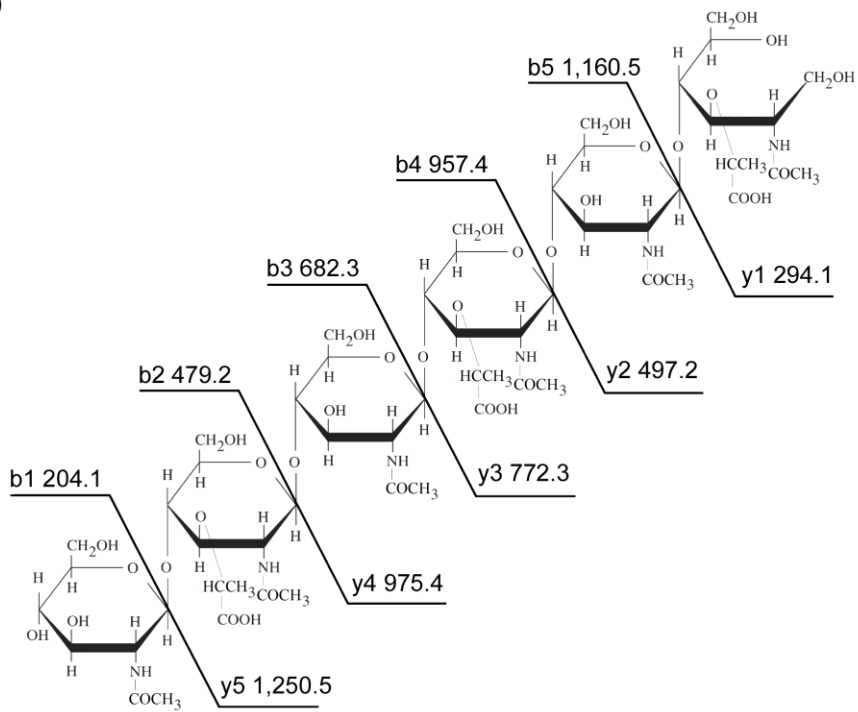

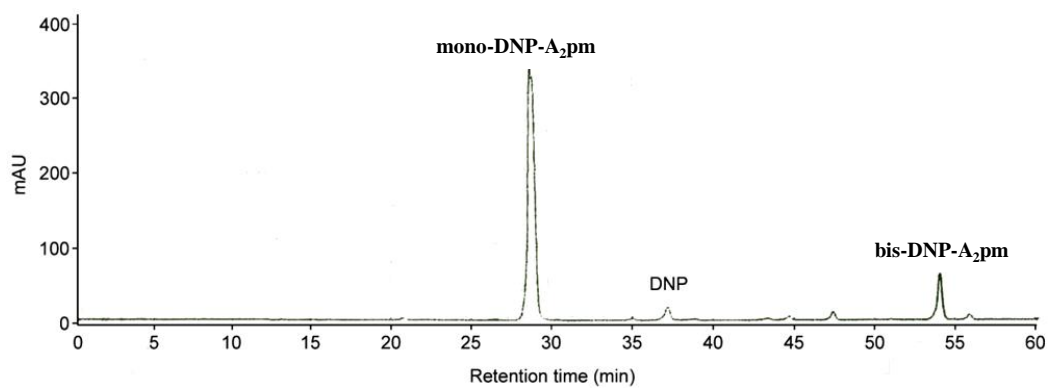

Supplemental Figure S4. Sudiarta *et al.*

*E. coli* cells

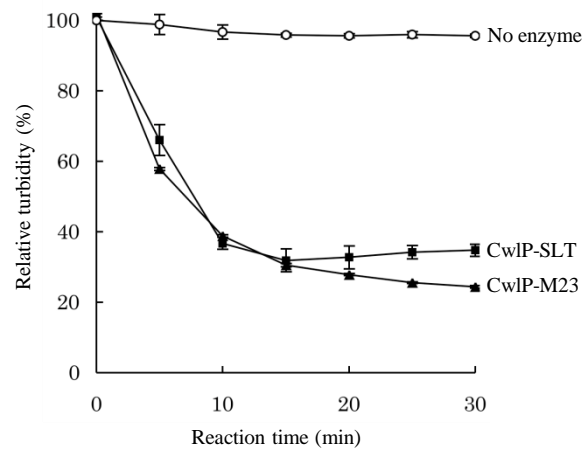

Supplement: supp_M110.156273_jbc.M110.156273-3.pdf [file supp_M110.156273_jbc.M110.156273-3.pdf]
